# Supplementary material for: The Effect of microRNAs in the Regulation of Human CYP3A4: a Systematic Study using a Mathematical Model
Source: PubMed Central journal article supplement — Sci Rep. 2014 Mar 5;4:4283. doi: 10.1038/srep04283 (PMC3942699; doi:10.1038/srep04283), 2014-03-05
Supplement: srep04283-s1.pdf [file srep04283-s1.pdf]

# The Effect of microRNAs in the Regulation of Human *CYP3A4*: a Systematic Study using a Mathematical Model

Zhiyun Wei, Songshan Jiang, Yiting Zhang, Xiaofei Wang, Xueling Peng, Chunjie Meng, Yichen Liu, Honglian Wang, Luo Guo, Shengying Qin, Lin He, Fengmin Shao, Lirong Zhang and Qinghe Xing

## Supplemental Results

### Mathematical model for miRNA function

The simplified model of miRNA action was schematically shown in Figure S3. The *CYP3A4* mRNA was produced with a transcription rate  $\tau_m$  and decayed with a rate  $\delta_m$ . Similarly, the miRNA was produced with a rate  $\tau_s$  and decayed with a rate  $\delta_s$ . mRNA and miRNA reversibly bound together to form the complex, with a forward rate  $\beta$  and a reverse rate  $\beta^-$ . The *CYP3A4* protein was produced with a translation rate  $\lambda$  from free mRNA and decayed with a rate  $\delta_p$ .

In the steady state, we had four formulas as follows:

$$\begin{aligned}\frac{dc_{fm}}{dt} &= \tau_m - \delta_m c_{fm} - \beta c_{fm} c_{fs} + \beta^- c_c = 0; \\ \frac{dc_{fs}}{dt} &= \tau_s - \delta_s c_{fs} - \beta c_{fm} c_{fs} + \beta^- c_c = 0; \\ \frac{dc_c}{dt} &= \beta c_{fm} c_{fs} - \beta^- c_c = 0; \\ \frac{dc_p}{dt} &= \lambda c_{fm} - \delta_p c_p = 0.\end{aligned}$$

Considering that the total RNA was denatured during extraction, the concentrations of mRNA and miRNA were actually  $c_m = c_{fm} + c_c$  and  $c_s = c_{fs} + c_c$ , respectively. The concept of

“translation efficiency”,  $e_{translation} = \frac{c_p}{c_m}$ , was used here to assess the influence of miRNA, as the

previous investigation<sup>20</sup>. Solving above equations, we could discover the relationship between the translation efficiency and the concentration of miRNA as

$$\frac{1}{e_{translation}} = \frac{c_m}{c_p} = \frac{\delta_p}{\lambda} + \frac{\beta \delta_p}{\lambda} \frac{\delta_m}{\beta^- \delta_m + \beta \tau_m} c_s = A + B \cdot c_s,$$

where  $A$  and  $B$  represented constants. It was convenient for researchers to evaluate significance of miRNA effect using such linear correlation.

**Supplemental Figure S1.** Flow chart of our systematic study for influence of miRNAs on *CYP3A4* expression.

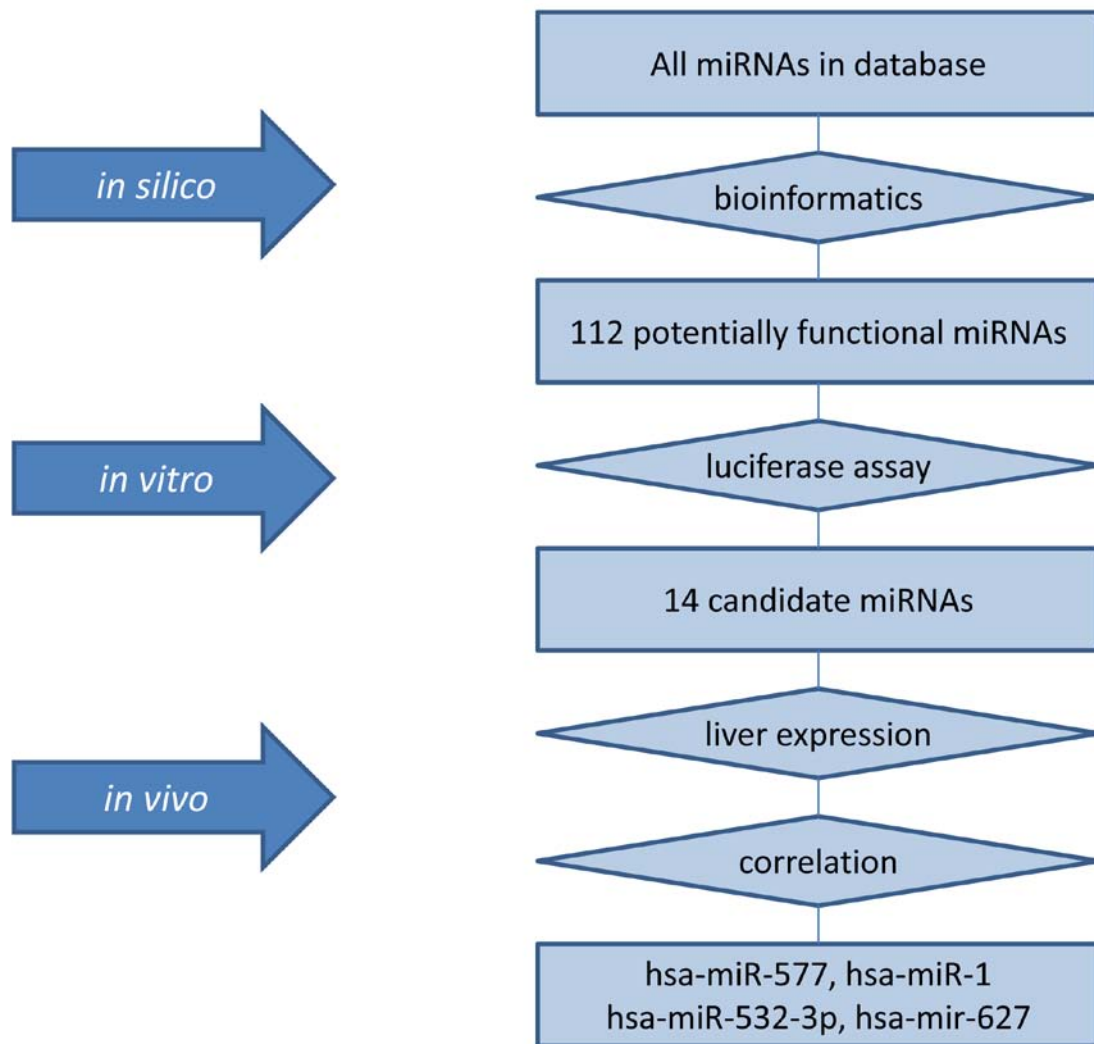

**Supplemental Figure S2.** Correlation of the expression of two reference genes.

There are significant correlations between the expression of two reference mRNAs (GAPDH and ACTB; A) and two reference small RNAs (U6 and SNORD38B; B).

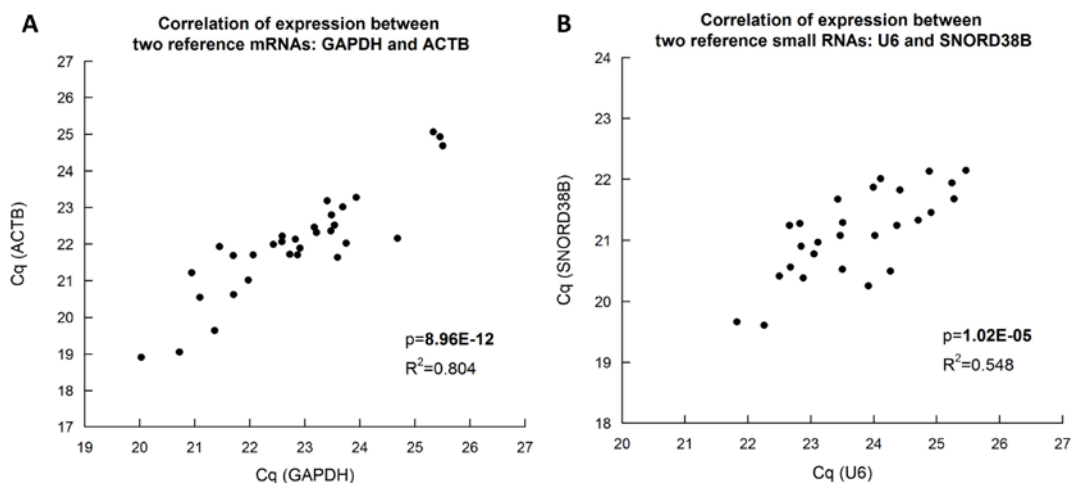

**Supplemental Figure S3.** Biochemistry involved in our model for microRNA function.

Solid arrows represent chemical reactions, while dotted arrows represent guiding synthesis without consumption of the reactant.

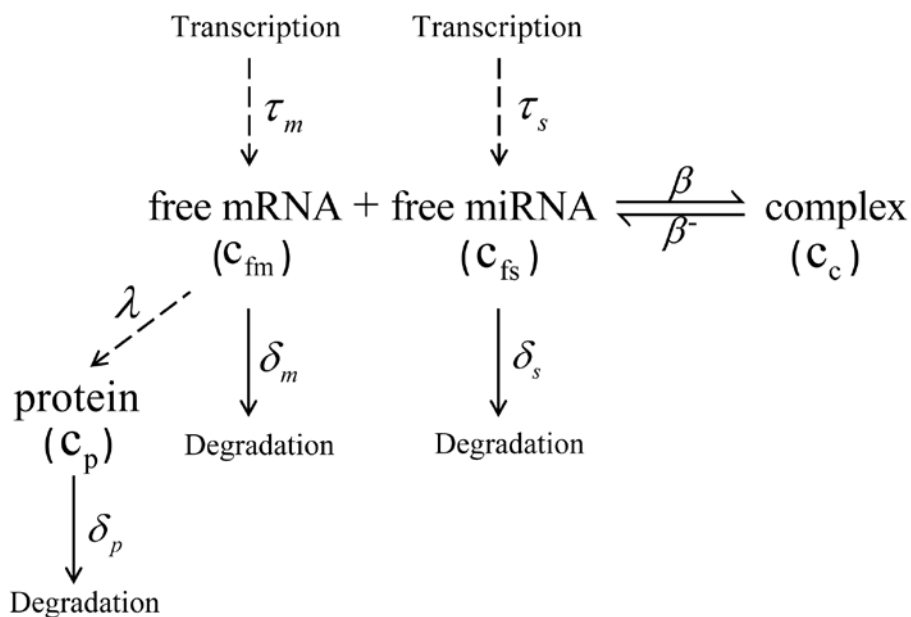

**Supplemental Table S1.** Relative luciferase ratio of miRNAs which were predicted by at least one of three prediction software.

| miRNA       | T | M | D | Relative luciferase ratio<br>(Normalized to the empty vector) | p value |
|-------------|---|---|---|---------------------------------------------------------------|---------|
| hsa-miR-27b | + | - | + | 0.544                                                         | 0.018   |
| hsa-miR-627 | + | - | + | 0.656                                                         | 0.016   |
| hsa-miR-653 | - | - | + | 0.672                                                         | 0.006   |

|                 |   |   |   |       |       |
|-----------------|---|---|---|-------|-------|
| hsa-miR-660     | - | + | - | 0.684 | 0.006 |
| hsa-miR-934     | - | + | - | 0.714 | 0.064 |
| hsa-miR-361     | + | + | + | 0.718 | 0.014 |
| hsa-miR-613     | + | - | - | 0.719 | 0.008 |
| hsa-miR-219-5p  | - | + | - | 0.720 | 0.050 |
| hsa-miR-526b    | + | - | - | 0.739 | 0.020 |
| hsa-miR-569     | + | + | + | 0.740 | 0.001 |
| hsa-miR-548a    | + | + | + | 0.761 | 0.019 |
| hsa-miR-582-3p  | - | - | + | 0.763 | 0.044 |
| hsa-miR-1       | + | - | + | 0.764 | 0.013 |
| hsa-miR-629     | + | - | - | 0.769 | 0.008 |
| hsa-miR-532-3p  | - | - | + | 0.773 | 0.010 |
| hsa-miR-374     | + | - | + | 0.787 | 0.066 |
| hsa-miR-559     | + | - | + | 0.790 | 0.006 |
| hsa-miR-578     | + | - | - | 0.794 | 0.057 |
| hsa-miR-577     | - | + | - | 0.800 | 0.006 |
| hsa-miR-609     | + | - | + | 0.803 | 0.059 |
| hsa-miR-637     | + | - | + | 0.807 | 0.014 |
| hsa-miR-548c-5p | - | + | + | 0.838 | 0.063 |
| hsa-miR-488     | - | + | + | 0.838 | 0.099 |
| hsa-miR-579     | + | - | + | 0.839 | 0.144 |
| hsa-miR-873     | - | - | + | 0.842 | 0.122 |
| hsa-miR-208     | + | - | - | 0.848 | 0.060 |
| hsa-miR-508-5p  | - | + | + | 0.859 | 0.168 |
| hsa-miR-31      | + | - | - | 0.864 | 0.138 |
| hsa-miR-765     | + | - | + | 0.864 | 0.106 |
| hsa-miR-142-3p  | + | - | + | 0.880 | 0.052 |
| hsa-miR-499     | + | + | + | 0.883 | 0.108 |
| hsa-miR-550     | - | - | + | 0.885 | 0.036 |
| hsa-miR-659     | + | - | + | 0.895 | 0.055 |
| hsa-miR-133b    | - | - | + | 0.899 | 0.374 |
| hsa-miR-543     | - | - | + | 0.902 | 0.103 |
| hsa-miR-511     | + | - | - | 0.921 | 0.260 |
| hsa-miR-766     | - | - | + | 0.921 | 0.337 |
| hsa-miR-517*    | - | + | - | 0.921 | 0.197 |
| hsa-miR-520a-5p | - | - | + | 0.924 | 0.084 |
| hsa-miR-525     | + | - | + | 0.926 | 0.258 |
| hsa-miR-580     | + | - | + | 0.928 | 0.371 |
| hsa-miR-518a-5p | - | + | - | 0.928 | 0.165 |
| hsa-miR-342-3p  | + | - | + | 0.951 | 0.257 |

|                 |   |   |   |       |       |
|-----------------|---|---|---|-------|-------|
| hsa-miR-519d    | + | - | - | 0.956 | 0.484 |
| hsa-miR-570     | - | - | + | 0.958 | 0.299 |
| hsa-miR-411     | + | - | + | 0.960 | 0.089 |
| hsa-miR-648     | - | - | + | 0.963 | 0.260 |
| hsa-miR-520g    | - | - | + | 0.964 | 0.293 |
| hsa-miR-616     | - | - | + | 0.969 | 0.364 |
| hsa-miR-429     | + | - | + | 0.971 | 0.422 |
| hsa-miR-491-3p  | - | - | + | 0.983 | 0.303 |
| hsa-miR-206     | + | - | + | 0.989 | 0.463 |
| hsa-miR-26a     | + | - | + | 0.998 | 0.130 |
| hsa-miR-410     | - | - | + | 1.014 | 0.444 |
| hsa-miR-326     | + | - | - | 1.021 | 0.405 |
| hsa-miR-133a    | - | - | + | 1.024 | 0.382 |
| hsa-miR-196a    | - | + | - | 1.025 | 0.258 |
| hsa-miR-453     | - | + | - | 1.053 | 0.297 |
| hsa-miR-106a    | + | - | - | 1.054 | 0.014 |
| hsa-miR-944     | - | - | + | 1.065 | 0.273 |
| hsa-miR-335*    | - | + | - | 1.066 | 0.071 |
| hsa-miR-25      | - | - | + | 1.075 | 0.019 |
| hsa-miR-576     | + | - | - | 1.076 | 0.061 |
| hsa-miR-17-5p   | + | - | - | 1.078 | 0.015 |
| hsa-miR-26b     | + | - | + | 1.084 | 0.090 |
| hsa-miR-892a    | - | - | + | 1.085 | 0.297 |
| hsa-miR-593     | - | - | + | 1.090 | 0.282 |
| hsa-miR-216     | + | - | - | 1.092 | 0.038 |
| hsa-miR-122     | + | - | + | 1.096 | 0.039 |
| hsa-miR-455-3p  | - | + | + | 1.097 | 0.081 |
| hsa-miR-655     | - | - | + | 1.098 | 0.337 |
| hsa-miR-548d-5p | - | + | + | 1.101 | 0.262 |
| hsa-miR-608     | + | + | + | 1.103 | 0.175 |
| hsa-miR-921     | - | - | + | 1.109 | 0.077 |
| hsa-miR-520h    | - | - | + | 1.115 | 0.087 |
| hsa-miR-106b    | + | - | + | 1.121 | 0.037 |
| hsa-miR-141     | + | - | + | 1.131 | 0.193 |
| hsa-miR-374b    | - | - | + | 1.140 | 0.037 |
| hsa-miR-224     | + | - | + | 1.149 | 0.019 |
| hsa-miR-181a*   | - | + | - | 1.163 | 0.009 |
| hsa-miR-505     | + | - | - | 1.166 | 0.011 |
| hsa-miR-452     | - | - | + | 1.182 | 0.000 |
| hsa-miR-599     | + | - | - | 1.193 | 0.041 |

|                 |   |   |   |       |       |
|-----------------|---|---|---|-------|-------|
| hsa-miR-200b    | + | - | + | 1.206 | 0.022 |
| hsa-miR-421     | + | - | - | 1.211 | 0.041 |
| hsa-miR-330-3p  | + | + | + | 1.224 | 0.011 |
| hsa-miR-494     | + | - | + | 1.255 | 0.039 |
| hsa-miR-369-3p  | + | - | + | 1.256 | 0.118 |
| hsa-miR-652     | - | + | - | 1.261 | 0.115 |
| hsa-miR-150     | + | - | + | 1.276 | 0.000 |
| hsa-miR-192     | - | - | + | 1.291 | 0.002 |
| hsa-miR-423-5p  | - | + | - | 1.296 | 0.022 |
| hsa-miR-20a     | + | - | + | 1.296 | 0.010 |
| hsa-miR-128a    | + | - | + | 1.304 | 0.122 |
| hsa-miR-200a    | + | - | + | 1.310 | 0.036 |
| hsa-miR-138-1*  | - | + | - | 1.315 | 0.027 |
| hsa-miR-203     | + | - | - | 1.324 | 0.073 |
| hsa-miR-138-2*  | - | + | - | 1.365 | 0.009 |
| hsa-miR-595     | + | - | - | 1.389 | 0.000 |
| hsa-miR-548b-5p | - | + | + | 1.429 | 0.086 |
| hsa-miR-409-3p  | - | - | + | 1.431 | 0.014 |
| hsa-miR-941     | - | - | + | 1.456 | 0.058 |
| hsa-miR-20b     | + | - | - | 1.483 | 0.004 |
| hsa-miR-140-5p  | - | - | + | 1.499 | 0.007 |
| hsa-miR-539     | + | + | + | 1.531 | 0.010 |
| hsa-miR-24      | + | - | + | NA    | NA    |
| hsa-miR-27a     | + | - | + | NA    | NA    |
| hsa-miR-152     | - | - | + | NA    | NA    |
| hsa-miR-200c    | + | - | + | NA    | NA    |
| hsa-miR-377*    | - | + | - | NA    | NA    |
| hsa-miR-378     | + | - | - | NA    | NA    |
| hsa-miR-431     | + | - | + | NA    | NA    |

---

T: TargetScan; M: miRbase; D: DIANA; NA: not available in our miRNA library.
